# Supplementary material for: Developing an Agent-Based Drug Model to Investigate the Synergistic Effects of Drug Combinations
Source: PubMed Central journal article supplement (PMC6149923; doi:10.3390/molecules22122209), 2017-12-14
Supplement: molecules-22-02209-s001.pdf [file molecules-22-02209-s001.pdf]

Article

# Developing an Agent-Based Drug Model to Investigate the Synergistic Effects of Drug Combinations

Hongjie Gao <sup>1</sup>, Zuoqing Yin <sup>2</sup>, Zhiwei Cao <sup>2,\*</sup> and Le Zhang <sup>1,3,\*</sup>

<sup>1</sup> College of Computer and Information Science, Southwest University, Chongqing 400715, China; ghjbarry@126.com

<sup>2</sup> School of Life and Technology, Tongji University, Shanghai 200092, China; ZuoJing\_Yin@tongji.edu.cn

<sup>3</sup> College of Computer Science, Sichuan University, Chengdu 610065, China

\* Correspondence: zwcao@tongji.edu.cn (Z.C.); zhangle06@scu.edu.cn (L.Z.)

**Supplementary Table 1:** Experimental data for the drugs gefitinib and rosiglitazone.

| Concentration ratio | Concentration of gefitinib | Concentration of rosiglitazone | Experimental data 1 | Experimental data 2 | Experimental data 3 | Mean  | Inhibition rate |
|---------------------|----------------------------|--------------------------------|---------------------|---------------------|---------------------|-------|-----------------|
| 5/0                 | 100                        | 0                              | 0.06                | 0.048               | 0.063               | 0.058 | 0.7863          |
|                     | 50                         | 0                              | 0.071               | 0.095               | 0.068               | 0.074 | 0.726           |
|                     | 25                         | 0                              | 0.176               | 0.187               | 0.184               | 0.183 | 0.332           |
|                     | 12.5                       | 0                              | 0.201               | 0.193               | 0.192               | 0.196 | 0.282           |
|                     | 6.25                       | 0                              | 0.216               | 0.213               | 0.214               | 0.213 | 0.22            |
| 4/1                 | 80                         | 20                             | 0.148               | 0.161               | 0.167               | 0.157 | 0.4262          |
|                     | 40                         | 10                             | 0.165               | 0.187               | 0.181               | 0.176 | 0.3575          |
|                     | 20                         | 5                              | 0.199               | 0.192               | 0.189               | 0.193 | 0.2935          |
|                     | 10                         | 2.5                            | 0.237               | 0.222               | 0.22                | 0.223 | 0.185           |
|                     | 5                          | 1.25                           | 0.268               | 0.25                | 0.242               | 0.255 | 0.07            |
| 3/2                 | 60                         | 40                             | 0.004               | 0.006               | 0.008               | 0.005 | 0.978           |
|                     | 30                         | 20                             | 0.173               | 0.155               | 0.158               | 0.162 | 0.4063          |
|                     | 15                         | 10                             | 0.207               | 0.197               | 0.194               | 0.199 | 0.2728          |
|                     | 7.5                        | 5                              | 0.207               | 0.201               | 0.232               | 0.210 | 0.231           |
|                     | 3.8                        | 2.5                            | 0.219               | 0.217               | 0.224               | 0.219 | 0.2016          |
| 2/3                 | 40                         | 60                             | 0.049               | 0.062               | 0.065               | 0.059 | 0.7815          |
|                     | 20                         | 30                             | 0.168               | 0.163               | 0.156               | 0.162 | 0.4066          |
|                     | 10                         | 15                             | 0.195               | 0.19                | 0.186               | 0.191 | 0.3036          |
|                     | 5                          | 7.5                            | 0.232               | 0.238               | 0.242               | 0.236 | 0.1362          |
|                     | 2.5                        | 3.8                            | 0.172               | 0.177               | 0.182               | 0.178 | 0.3505          |
| 1/4                 | 20                         | 80                             | 0.158               | 0.163               | 0.169               | 0.164 | 0.4004          |
|                     | 10                         | 40                             | 0.178               | 0.184               | 0.187               | 0.180 | 0.34            |
|                     | 5                          | 20                             | 0.211               | 0.208               | 0.197               | 0.205 | 0.249           |
|                     | 2.5                        | 10                             | 0.219               | 0.186               | 0.235               | 0.208 | 0.238           |
|                     | 1.25                       | 5                              | 0.188               | 0.205               | 0.166               | 0.186 | 0.32            |
| 0/5                 | 0                          | 100                            | 0.199               | 0.204               | 0.209               | 0.204 | 0.253           |
|                     | 0                          | 50                             | 0.219               | 0.223               | 0.225               | 0.222 | 0.189           |
|                     | 0                          | 25                             | 0.227               | 0.225               | 0.22                | 0.223 | 0.186           |
|                     | 0                          | 12.5                           | 0.219               | 0.228               | 0.219               | 0.223 | 0.186           |
|                     | 0                          | 6.25                           | 0.217               | 0.21                | 0.203               | 0.210 | 0.23            |
| Negative Control    | 0                          | 0                              | 0.219               | 0.223               | 0.227               | 0.223 | /               |

**Supplementary Table 2:** Experimental data for the drugs erlotinib and imatinib.

| Concentration ratio | Concentration of erlotinib | Concentration of imatinib | Experimental data 1 | Experimental data 2 | Experimental data 3 | Mean   | Inhibition rate |
|---------------------|----------------------------|---------------------------|---------------------|---------------------|---------------------|--------|-----------------|
| 5/0                 | 100                        | 0                         | 0.111               | 0.113               | 0.112               | 0.1121 | 0.8118          |
|                     | 50                         | 0                         | 0.211               | 0.195               | 0.206               | 0.2038 | 0.6579          |
|                     | 25                         | 0                         | 0.351               | 0.371               | 0.356               | 0.3598 | 0.3959          |
|                     | 12.5                       | 0                         | 0.472               | 0.508               | 0.505               | 0.4937 | 0.1712          |
|                     | 6.25                       | 0                         | 0.494               | 0.514               | 0.549               | 0.5171 | 0.1319          |
| 4/1                 | 80                         | 20                        | 0.095               | 0.086               | 0.096               | 0.0923 | 0.8450          |
|                     | 40                         | 10                        | 0.229               | 0.182               | 0.196               | 0.1957 | 0.6714          |
|                     | 20                         | 5                         | 0.278               | 0.315               | 0.326               | 0.3107 | 0.4784          |
|                     | 10                         | 2.5                       | 0.299               | 0.338               | 0.36                | 0.3438 | 0.4227          |
|                     | 5                          | 1.25                      | 0.317               | 0.348               | 0.337               | 0.3358 | 0.4363          |
| 3/2                 | 60                         | 40                        | 0.113               | 0.141               | 0.139               | 0.1293 | 0.7829          |
|                     | 30                         | 20                        | 0.298               | 0.275               | 0.294               | 0.2879 | 0.5166          |
|                     | 15                         | 10                        | 0.353               | 0.401               | 0.377               | 0.3862 | 0.3516          |
|                     | 7.5                        | 5                         | 0.400               | 0.433               | 0.445               | 0.4344 | 0.2707          |
|                     | 3.8                        | 2.5                       | 0.442               | 0.504               | 0.488               | 0.4895 | 0.1782          |
| 2/3                 | 40                         | 60                        | 0.300               | 0.257               | 0.262               | 0.2681 | 0.5499          |
|                     | 20                         | 30                        | 0.309               | 0.289               | 0.315               | 0.3073 | 0.4841          |
|                     | 10                         | 15                        | 0.381               | 0.363               | 0.372               | 0.3741 | 0.3720          |
|                     | 5                          | 7.5                       | 0.465               | 0.381               | 0.432               | 0.4366 | 0.2670          |
|                     | 2.5                        | 3.8                       | 0.511               | 0.514               | 0.53                | 0.5188 | 0.1291          |
| 1/4                 | 20                         | 80                        | 0.254               | 0.251               | 0.254               | 0.2528 | 0.5755          |
|                     | 10                         | 40                        | 0.275               | 0.28                | 0.289               | 0.2837 | 0.5237          |
|                     | 5                          | 20                        | 0.318               | 0.301               | 0.327               | 0.3148 | 0.4714          |
|                     | 2.5                        | 10                        | 0.392               | 0.395               | 0.407               | 0.3996 | 0.3291          |
|                     | 1.25                       | 5                         | 0.418               | 0.432               | 0.446               | 0.4277 | 0.2820          |
| 0/5                 | 0                          | 100                       | 0.241               | 0.258               | 0.245               | 0.2498 | 0.5807          |
|                     | 0                          | 50                        | 0.288               | 0.278               | 0.286               | 0.2842 | 0.5229          |
|                     | 0                          | 25                        | 0.401               | 0.345               | 0.358               | 0.3652 | 0.386           |
|                     | 0                          | 12.5                      | 0.416               | 0.346               | 0.425               | 0.4255 | 0.2857          |
|                     | 0                          | 6.25                      | 0.456               | 0.445               | 0.465               | 0.4545 | 0.2369          |
| Negative Control    | 0                          | 0                         | 0.581               | 0.572               | 0.598               | 0.584  | /               |

**Supplementary Table 3:** Experimental data for the drugs gefitinib and quinacrine.

| Concentration ratio | Concentration of gefitinib | Concentration of quinacrine | Experimental data 1 | Experimental data 2 | Experimental data 3 | Mean   | Inhibition rate |
|---------------------|----------------------------|-----------------------------|---------------------|---------------------|---------------------|--------|-----------------|
| 5/0                 | 100                        | 0                           | 0.160               | 0.193               | 0.1820              | 0.1777 | 0.6779          |
|                     | 50                         | 0                           | 0.2350              | 0.1990              | 0.2050              | 0.2100 | 0.6194          |
|                     | 25                         | 0                           | 0.2970              | 0.306               | 0.331               | 0.3128 | 0.4332          |
|                     | 12.5                       | 0                           | 0.355               | 0.3280              | 0.3110              | 0.3243 | 0.4124          |
|                     | 6.25                       | 0                           | 0.373               | 0.323               | 0.348               | 0.3383 | 0.3869          |
| 4/1                 | 80                         | 20                          | 0.004               | 0.0020              | 0.0030              | 0.0030 | 0.9945          |
|                     | 40                         | 10                          | 0.021               | 0.0168              | 0.0177              | 0.0183 | 0.9667          |
|                     | 20                         | 5                           | 0.013               | 0.016               | 0.011               | 0.0139 | 0.9747          |
|                     | 10                         | 2.5                         | 0.278               | 0.291               | 0.293               | 0.2863 | 0.4813          |
|                     | 5                          | 1.25                        | 0.336               | 0.382               | 0.369               | 0.3522 | 0.3619          |
| 3/2                 | 60                         | 40                          | 0.0020              | 0.0030              | 0.0040              | 0.0031 | 0.9942          |
|                     | 30                         | 20                          | 0.0180              | 0.0160              | 0.017               | 0.0169 | 0.9693          |
|                     | 15                         | 10                          | 0.0230              | 0.029               | 0.0230              | 0.0243 | 0.9558          |
|                     | 7.5                        | 5                           | 0.124               | 0.143               | 0.133               | 0.1362 | 0.7532          |
|                     | 3.8                        | 2.5                         | 0.2130              | 0.2260              | 0.235               | 0.2261 | 0.5903          |
| 2/3                 | 40                         | 60                          | 0.002               | 0.0010              | 0.0030              | 0.0023 | 0.9958          |
|                     | 20                         | 30                          | 0.0130              | 0.0180              | 0.0140              | 0.0150 | 0.9728          |
|                     | 10                         | 15                          | 0.0170              | 0.0170              | 0.0140              | 0.0165 | 0.97            |
|                     | 5                          | 7.5                         | 0.0190              | 0.0260              | 0.0150              | 0.0221 | 0.9598          |
|                     | 2.5                        | 3.8                         | 0.3310              | 0.3210              | 0.327               | 0.3251 | 0.41            |
| 1/4                 | 20                         | 80                          | 0.0030              | 0.0020              | 0.0040              | 0.0031 | 0.994           |
|                     | 10                         | 40                          | 0.0180              | 0.0150              | 0.0210              | 0.0180 | 0.96            |
|                     | 5                          | 20                          | 0.0260              | 0.0380              | 0.0270              | 0.0283 | 0.948           |
|                     | 2.5                        | 10                          | 0.0630              | 0.0490              | 0.060               | 0.0562 | 0.898           |
|                     | 1.25                       | 5                           | 0.1660              | 0.2040              | 0.1850              | 0.1820 | 0.6701          |
| 0/5                 | 0                          | 100                         | 0.0080              | 0.0060              | 0.0080              | 0.0076 | 0.986           |
|                     | 0                          | 50                          | 0.019               | 0.021               | 0.020               | 0.0200 | 0.9637          |
|                     | 0                          | 25                          | 0.034               | 0.029               | 0.028               | 0.0302 | 0.9452          |
|                     | 0                          | 12.5                        | 0.055               | 0.039               | 0.0440              | 0.0463 | 0.9161          |
|                     | 0                          | 6.25                        | 0.129               | 0.119               | 0.1180              | 0.1223 | 0.7782          |
| Negative Control    | 0                          | 0                           | 0.519               | 0.55                | 0.588               | 0.552  | /               |

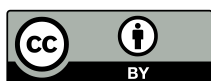

© 2017 by the authors. Submitted for possible open access publication under the terms and conditions of the Creative Commons Attribution (CC BY) license (<http://creativecommons.org/licenses/by/4.0/>).
